# Supplementary material for: Unveiling genetic insights: Array-CGH and WES discoveries in a cohort of 122 children with essential autism spectrum disorder
Source: PubMed Central journal article supplement (PMC11629504; doi:10.1186/s12864-024-11077-5), 2024-12-10
Supplement: 12864_2024_11077_MOESM1_ESM.pdf [file 12864_2024_11077_MOESM1_ESM.pdf]

**Supplementary Table 1.** Sequence variants identified by whole exome sequencing.

| CASE | SEX | GENE         | SFARI SC | GENETIC STATE | HGVSC              | HGVSP                  | LOCATION     | Max AF      | CADD score | ACMG                  | VARIANT CLASSIFICATION WES |
|------|-----|--------------|----------|---------------|--------------------|------------------------|--------------|-------------|------------|-----------------------|----------------------------|
| A001 | F   | OTOP3        | //       | COMP HET      | c.17G>C            | p.Arg6Pro              | 17:72931913  | 0           | 23         | UncertainSignificance | VOUS                       |
| A001 | F   | OTOP3        | //       | COMP HET      | c.154G>A           | p.Val52Met             | 17:72937568  | 0,000233155 | 0,001      | UncertainSignificance | VOUS                       |
| A001 | F   | ACRBP        | //       | COMP HET      | c.1487delT         | p.Leu496fs             | 12:6748141   | 0           | 33         | UncertainSignificance | VOUS                       |
| A001 | F   | ACRBP        | //       | COMP HET      | c.431T>C           | p.Val144Ala            | 12:6754430   | 8,13253E-06 | 5,049      | UncertainSignificance | VOUS                       |
| A001 | F   | IQCIN        | //       | COMP HET      | c.3332A>G          | p.His1111Arg           | 19:18368201  | 0,001162791 | 0,063      | UncertainSignificance | VOUS                       |
| A001 | F   | IQCIN        | //       | COMP HET      | c.349T>C           | p.Tyr117His            | 19:18378001  | 0           | 10,7       | UncertainSignificance | VOUS                       |
| A001 | F   | B3GNT8       | //       | COMP HET      | c.557C>T           | p.Ser186Phe            | 19:41932127  | 0,003372093 | 25.8       | UncertainSignificance | VOUS                       |
| A001 | F   | B3GNT8       | //       | COMP HET      | c.210T>G           | p.Phe70Leu             | 19:41932474  | 0,001981352 | 0.369      | UncertainSignificance | VOUS                       |
| A001 | F   | AKAP9        | 2        | HOM           | c.10459G>A         | p.Glu3487Lys           | 7:91726960   | 0,000813953 | 26.3       | UncertainSignificance | VOUS                       |
| A002 | M   | PPP2R1B      | 2        | COMP HET      | c.1645C>T          | p.Arg549Cys            | 11:111613299 | 0,00013006  | 34         | LikelyPathogenic      | P                          |
| A002 | M   | PPP2R1B      | 2        | COMP HET      | c.269G>A           | p.Gly90Asp             | 11:111635566 | 0,012217826 | 15,11      | UncertainSignificance | LB                         |
| A002 | M   | GPRASP1      | //       | HEM           | c.3535A>G          | p.Met1179Val           | X:101912376  | 3,91578E-05 | 23.2       | UncertainSignificance | LP                         |
| A003 | M   | ATRX         | 1        | HEM           | c.2265T>G          | p.Asn755Lys            | X:76938483   | 0           | 18,73      | UncertainSignificance | VOUS                       |
| A003 | M   | SOX3         | //       | HEM           | c.571G>A           | p.Glu191Lys            | X:139586655  | 0           | 32         | UncertainSignificance | VOUS                       |
| A005 | F   | PTK7         | 1        | COMP HET      | c.86C>A            | p.Pro29His             | 6:43044707   | 0,003369587 | 12.95      | LikelyBenign          | LB                         |
| A005 | F   | PTK7         | 1        | COMP HET      | c.1085G>A          | p.Arg362Gln            | 6:43100282   | 0,00016275  | 16.86      | UncertainSignificance | VOUS                       |
| A005 | F   | FAT1         | 2        | COMP HET      | c.6782C>T          | p.Thr2261Met           | 4:187540958  | 0,000998403 | 24.3       | UncertainSignificance | VOUS                       |
| A005 | F   | FAT1         | 2        | COMP HET      | c.2563G>A          | p.Gly855Arg            | 4:187628419  | 0,003128008 | 24.2       | UncertainSignificance | VOUS                       |
| A006 | M   | MAGEC1       | //       | HEM           | c.1950T>G          | p.Ser650Arg            | X:140995140  | 0,000148633 | 0.251      | UncertainSignificance | VOUS                       |
| A006 | M   | RBMXL3       | //       | HEM           | c.1108C>T          | p.Arg370Cys            | X:114425112  | 1,83719E-05 | 18.52      | UncertainSignificance | VOUS                       |
| A006 | M   | FATE1        | //       | HEM           | c.298G>C           | p.Glu100Gln            | X:150889930  | 0,000445898 | 21.1       | UncertainSignificance | VOUS                       |
| A007 | M   | CAPN9        | //       | COMP HET      | c.655_656insT      | p.Leu220fs             | 1:230903405  | 0           | 28         | UncertainSignificance | VOUS                       |
| A007 | M   | CAPN9        | //       | COMP HET      | c.881C>T           | p.Pro294Leu            | 1:230910305  | 0,000226963 | 14.04      | UncertainSignificance | LB                         |
| A007 | M   | CT83         | //       | HEM           | c.313G>A           | p.Gly105Ser            | X:115592937  | 5.46e-6     | 8.441      | UncertainSignificance | LB                         |
| A007 | M   | LOC101059915 | //       | HEM           | c.97C>T            | p.Arg33Trp             | X:70887750   | 0,000264901 | 2.851      | UncertainSignificance | LB                         |
| A007 | M   | MMACHC       | //       | COMP HET      | c.276G>T           | p.Glu92Asp             | 1:45973222   | 1,62555E-05 | 23.5       | UncertainSignificance | VOUS                       |
| A007 | M   | MMACHC       | //       | COMP HET      | c.818G>C           | p.Arg273Thr            | 1:45974856   | 0           | 1.436      | UncertainSignificance | LB                         |
| A008 | M   | AHDC1        | 1        | COMP HET      | c.4711C>T          | p.Pro1571Ser           | 1:27873916   | 4,56429E-06 | 23.8       | UncertainSignificance | VOUS                       |
| A008 | M   | AHDC1        | 1        | COMP HET      | c.4000G>A          | p.Gly1334Ser           | 1:27874627   | 0,000599042 | 10.97      | LikelyBenign          | LB                         |
| A008 | M   | B4GALT2      | //       | COMP HET      | c.174_175insAGCAGC | p.Ser59_Ser60insSerSer | 1:44447006   | 4,66699E-05 | 15.9       | UncertainSignificance | VOUS                       |
| A008 | M   | B4GALT2      | //       | COMP HET      | c.605C>T           | p.Ala202Val            | 1:44450592   | 5,68791E-05 | 23.4       | UncertainSignificance | VOUS                       |
| A008 | M   | PTPRF        | //       | COMP HET      | c.635C>T           | p.Ser212Leu            | 1:44044547   | 8,124E-06   | 27.2       | UncertainSignificance | VOUS                       |
| A008 | M   | PTPRF        | //       | COMP HET      | c.2698T>A          | p.Leu900Met            | 1:44069521   | 4,06306E-06 | 18.77      | UncertainSignificance | VOUS                       |
| A008 | M   | KLF8         | //       | HEM           | c.72_73insT        | p.Lys26fs              | X:56276728   | 5,64137E-06 | 23.2       | UncertainSignificance | VOUS                       |
| A008 | M   | SLC35A2      | //       | HEM           | c.1021C>G          | p.Pro341Ala            | X:48762165   | 5,66187E-06 | 23.8       | UncertainSignificance | VOUS                       |
| A009 | M   | CC2D1A       | 2        | COMP HET      | c.-191G>T          |                        | 19:14017064  | 0           | 6.163      | UncertainSignificance | VOUS                       |
| A009 | M   | CC2D1A       | 2        | COMP HET      | c.566C>T           | p.Ala189Val            | 19:14024269  | 0,011981788 | 0.576      | LikelyBenign          | LB                         |
| A009 | M   | NSUN2        | //       | COMP HET      | c.254+1G>A         |                        | 5:6632711    | 0           | 33         | Pathogenic            | LP                         |
| A009 | M   | NSUN2        | //       | COMP HET      | c.-73C>T           |                        | 5:6633165    | 0,0115815   | 6.54       | Benign                | LB                         |
| A010 | M   | CACNA1F      | 2        | HEM           | c.5474G>A          | p.Arg1825His           | X:490633003  | 0,000148633 | 22.2       | UncertainSignificance | VOUS                       |
| A010 | M   | PLXNB3       | //       | HEM           | c.3289G>A          | p.Val1097Ile           | X:153039323  | 0,000148655 | 11.37      | UncertainSignificance | VOUS                       |
| A010 | M   | ASB11        | //       | HEM           | c.295G>C           | p.Val99Leu             | X:15315770   | 5,6803E-05  | 26.1       | UncertainSignificance | VOUS                       |
| A011 | M   | CACNA1G      | 2        | COMP HET      | c.354+5_354+6delGT |                        | 17:48646346  | 0           | 15.34      | UncertainSignificance | VOUS                       |
| A011 | M   | CACNA1G      | 2        | COMP HET      | c.3000A>C          | p.Glu1000Asp           | 17:48673943  | 0,000199681 | 15.27      | UncertainSignificance | VOUS                       |
| A011 | M   | L3MBTL1      | //       | COMP HET      | c.947G>A           | p.Trp316*              | 20:42159462  | 0,000191197 | 42         | UncertainSignificance | VOUS                       |
| A011 | M   | L3MBTL1      | //       | COMP HET      | c.1627A>G          | p.Arg543Gly            | 20:42164548  | 6,78372E-05 | 25.0       | LikelyBenign          | VOUS                       |
| A011 | M   | STARD9       | //       | COMP HET      | c.158A>G           | p.Lys53Arg             | 15:42877759  | 0,001572327 | 24.9       | UncertainSignificance | VOUS                       |
| A011 | M   | STARD9       | //       | COMP HET      | c.8410G>T          | p.Ala2804Ser           | 15:42982186  | 9,80049E-05 | 2.621      | UncertainSignificance | LB                         |
| A011 | M   | DHODH        | //       | COMP HET      | c.833G>A           | p.Gly278Glu            | 16:72057077  | 8,04305E-06 | 26.4       | UncertainSignificance | VOUS                       |
| A011 | M   | DHODH        | //       | COMP HET      | c.982C>A           | p.Pro328Thr            | 16:72057381  | 4,00917E-06 | 24.7       | UncertainSignificance | VOUS                       |

|      |   |         |    |          |                       |                  |              |             |       |                       |      |
|------|---|---------|----|----------|-----------------------|------------------|--------------|-------------|-------|-----------------------|------|
| A011 | M | MAML1   | // | COMP HET | c.2002C>T             | p.Arg668Cys      | 5:179198178  | 0,000116279 | 32    | UncertainSignificance | VOUS |
| A011 | M | MAML1   | // | COMP HET | c.2003G>A             | p.Arg668His      | 5:179198179  | 7,95469E-06 | 32    | UncertainSignificance | VOUS |
| A011 | M | NRXN1   | 1  | HETdn    | c.-117C>T             |                  | 2:50201255   | 0,003311047 | 21.5  | UncertainSignificance | VOUS |
| A012 | M | UPF3B   | 1  | HEM      | c.931C>T              | p.Arg311Cys      | X:118972367  | 2,24006E-05 | 26.8  | UncertainSignificance | VOUS |
| A012 | M | RANGAP1 | // | COMP HET | c.1152_1154delGGA     | p.Glu385del      | 22:41650417  | 0,001574994 | 12.87 | UncertainSignificance | LB   |
| A012 | M | RANGAP1 | // | COMP HET | c.502G>A              | p.Glu168Lys      | 22:41657563  | 0,000199681 | 24.0  | UncertainSignificance | VOUS |
| A013 | M | PGK1    | // | HEM      | c.506C>T              | p.Ala169Val      | X:77372897   | 0,001       | 29.3  | LikelyPathogenic      | LP   |
| A013 | M | CIC     | 1  | HETdn    | c.4779_4780insGCGC    | p.Pro1594fs      | 19:42799295  | 0           | 23.4  | UncertainSignificance | LP   |
| A013 | M | FBXO33  | 2  | COMP HET | c.101_109delAGCTGCGAC | p.Gln34_Arg36del | 14:39901257  | 0,006839526 | 20.2  | LikelyBenign          | VOUS |
| A013 | M | FBXO33  | 2  | COMP HET | c.16T>A               | p.Ser6Thr        | 14:39901351  | 0,000206889 | 25.0  | UncertainSignificance | VOUS |
| A013 | M | SLC12A3 | // | COMP HET | c.37G>C               | p.Ala13Pro       | 16:56899184  | 0,001395349 | 3.409 | UncertainSignificance | LB   |
| A013 | M | SLC12A3 | // | COMP HET | c.1795C>T             | p.Leu599Phe      | 16:56918086  | 8,56046E-05 | 25.3  | UncertainSignificance | VOUS |
| A014 | M | EGFL6   | // | HEM      | c.1551+1G>C           |                  | X:13645396   | 0           | 23.7  | UncertainSignificance | VOUS |
| A014 | M | PTPRB   | 2  | COMP HET | c.1898G>A             | p.Arg633Gln      | 12:70974842  | 0,000241371 | 32    | UncertainSignificance | VOUS |
| A014 | M | PTPRB   | 2  | COMP HET | c.499G>C              | p.Glu167Gln      | 12:70989934  | 0           | 3,72  | UncertainSignificance | VOUS |
| A014 | M | HIVEP2  | 1  | COMP HET | c.3383C>T             | p.Pro1128Leu     | 6:143092493  | 0,000199681 | 16,67 | UncertainSignificance | VOUS |
| A014 | M | HIVEP2  | 1  | COMP HET | c.1471A>T             | p.Ser491Cys      | 6:143094405  | 0           | 10.19 | UncertainSignificance | VOUS |
| A014 | M | VEGFD   | // | HEM      | c.116G>C              | p.Arg39Pro       | X:15381416   | 0           | 16.47 | UncertainSignificance | VOUS |
| A014 | M | MBTPS2  | // | HEM      | c.706A>G              | p.Ile236Val      | X:21886620   | 0,000148633 | 19.20 | UncertainSignificance | VOUS |
| A015 | F | USH2A   | 2  | COMP HET | c.15095G>A            | p.Ser5032Asn     | 1:215808003  | 0,001       | 7,243 | UncertainSignificance | VOUS |
| A015 | F | USH2A   | 2  | COMP HET | c.8681+6A>T           |                  | 1:216051094  | 0           | 17,66 | UncertainSignificance | VOUS |
| A015 | F | USH2A   | 2  | COMP HET | c.6628C>G             | p.Pro2210Ala     | 1:216172258  | 0,012       | 19,41 | LikelyBenign          | VOUS |
| A016 | M | ABC1    | // | HET      | c.3901C>T             | p.Arg1301Cys     | 16:16225727  | 0,000827973 | 25,2  | UncertainSignificance | VOUS |
| A019 | M | TCEAL2  | // | HEM      | c.78C>G               | p.His26Gln       | X:101381880  | 0           | 6.371 | UncertainSignificance | LB   |
| A019 | M | GRIN2A  | 1  | COMP HET | c.4307A>G             | p.Asn1436Ser     | 16:9857094   | 0,000618047 | 16.74 | UncertainSignificance | VOUS |
| A019 | M | GRIN2A  | 1  | COMP HET | c.2899G>C             | p.Val967Leu      | 16:9858502   | 0,007674419 | 15.90 | Benign                | LB   |
| A020 | M | KCND1   | // | HEM      | c.1373G>A             | p.Ser458Asn      | X:48823079   | 0           | 9.926 | UncertainSignificance | LB   |
| A020 | M | SPEN    | 2  | COMP HET | c.9730A>C             | p.Thr3244Pro     | 1:16262465   | 0,039960725 | 3.812 | Benign                | LB   |
| A020 | M | SPEN    | 2  | COMP HET | c.10391G>C            | p.Gly3464Ala     | 1:16264022   | 0,00255814  | 22.7  | UncertainSignificance | VOUS |
| A021 | F | LRP2    | 2  | HOM      | c.13803G>A            | p.Met4601Ile     | 2:169985338  | 0,00771675  | 23.4  | LikelyBenign          | VOUS |
| A021 | F | MS4A18  | // | COMP HET | c.314C>T              | p.Thr105Met      | 11:60497102  | 6,95185E-05 | 15,44 | UncertainSignificance | VOUS |
| A021 | F | MS4A18  | // | COMP HET | c.330G>A              | p.Trp110*        | 11:60497118  | 0           | 26,7  | UncertainSignificance | VOUS |
| A021 | F | YLPM1   | // | COMP HET | c.4873A>G             | p.Met1625Val     | 14:75276434  | 0,000120337 | 16,12 | UncertainSignificance | VOUS |
| A021 | F | YLPM1   | // | COMP HET | c.5903G>T             | p.Gly1968Val     | 14:75283937  | 2,22902E-05 | 24,6  | UncertainSignificance | VOUS |
| A021 | F | CIC     | 1  | COMP HET | c.419G>A              | p.Arg140Gln      | 19:42776354  | 0           | 6,992 | UncertainSignificance | VOUS |
| A021 | F | CIC     | 1  | COMP HET | c.157G>T              | p.Val53Leu       | 19:42791012  | 0           | 22,8  | UncertainSignificance | VOUS |
| A022 | M | AMER1   | // | HEM      | c.1255C>T             | p.Pro419Ser      | X:63411912   | 0           | 7.174 | LikelyBenign          | LB   |
| A022 | M | NHS     | // | HEM      | c.1100C>T             | p.Ser367Leu      | X:17742473   | 0,000297265 | 25.1  | UncertainSignificance | VOUS |
| A022 | M | CXorf67 | // | HEM      | c.836G>A              | p.Arg279His      | X:51150704   | 4,14267E-05 | 0.014 | UncertainSignificance | VOUS |
| A024 | M | RPL3L   | // | HOM      | c.280G>A              | p.Ala94Thr       | 16:2002960   | 0,006860465 | 21.0  | UncertainSignificance | VOUS |
| A024 | M | DST     | 2  | COMP HET | c.5909T>C             | p.Phe1970Ser     | 6:56482923   | 0,004464286 | 20.6  | LikelyBenign          | VOUS |
| A024 | M | DST     | 2  | COMP HET | c.3130A>G             | p.Met1044Val     | 6:56490044   | 2,43748E-05 | 26.4  | UncertainSignificance | VOUS |
| A024 | M | SEC31B  | // | COMP HET | c.1759G>T             | p.Glu587*        | 10:102257890 | 0,000581395 | 37    | UncertainSignificance | VOUS |
| A024 | M | SEC31B  | // | COMP HET | c.323C>T              | p.Ser108Leu      | 10:102269149 | 0,000348837 | 21.8  | UncertainSignificance | VOUS |
| A024 | M | PDZD2   | // | COMP HET | c.4528G>A             | p.Asp1510Asn     | 5:32088082   | 0,00068089  | 19,87 | UncertainSignificance | VOUS |
| A024 | M | PDZD2   | // | COMP HET | c.5508G>T             | p.Met1836Ile     | 5:32089062   | 0           | 0,636 | UncertainSignificance | VOUS |
| A025 | M | PREX2   | // | COMP HET | c.2648G>A             | p.Ser883Asn      | 8:69012011   | 0           | 21.7  | UncertainSignificance | VOUS |
| A025 | M | PREX2   | // | COMP HET | c.3644G>A             | p.Arg1215Gln     | 8:69033204   | 0,000998403 | 22.8  | UncertainSignificance | VOUS |
| A025 | M | DHX8    | // | HETdn    | c.2534C>G             | p.Ser845Trp      | 17:41590761  | 0           | 33    | UncertainSignificance | VOUS |
| A026 | M | SYN1    | 1  | HEM      | c.1615G>A             | p.Gly539Ser      | X:47433768   | 0,000533618 | 20.1  | UncertainSignificance | VOUS |
| A026 | M | ACTL9   | // | HOM      | c.1199G>A             | p.Arg400Gln      | 19:8807853   | 0,000453926 | 23.5  | UncertainSignificance | VOUS |
| A026 | M | OR2Z1   | // | HOM      | c.473T>A              | p.Ile158Asn      | 19:8841863   | 0,000798722 | 22.8  | UncertainSignificance | VOUS |
| A026 | M | OR2Z1   | // | HOM      | c.653A>G              | p.Tyr218Cys      | 19:8842043   | 0,000798722 | 24.4  | UncertainSignificance | VOUS |

|      |   |              |    |          |             |              |              |             |       |                       |      |
|------|---|--------------|----|----------|-------------|--------------|--------------|-------------|-------|-----------------------|------|
| A026 | M | ZHX1         | // | COMP HET | c.1325C>T   | p.Pro442Leu  | 8:124266862  | 0,000465116 | 17.47 | UncertainSignificance | VOUS |
| A026 | M | ZHX1         | // | COMP HET | c.376C>A    | p.Pro126Thr  | 8:124267811  | 0,000199681 | 22.9  | UncertainSignificance | VOUS |
| A026 | M | RBMXL3       | // | HEM      | c.1673G>A   | p.Arg558His  | X:114425677  | 2,71172E-05 | 16.42 | UncertainSignificance | VOUS |
| A026 | M | MAP7D3       | // | HEM      | c.115G>A    | p.Val39Met   | X:135328456  | 0,000590842 | 15.76 | UncertainSignificance | VOUS |
| A026 | M | VSIG4        | // | HEM      | c.644G>A    | p.Gly215Asp  | X:65252360   | 1,12194E-05 | 18.44 | UncertainSignificance | VOUS |
| A027 | M | ZNF630       | // | HEM      | c.856A>G    | p.Lys286Glu  | X:47918603   | 0           | 22.1  | UncertainSignificance | VOUS |
| A027 | M | ICE1         | // | COMP HET | c.791C>T    | p.Thr264Ile  | 5:5457544    | 4,01916E-06 | 22.2  | UncertainSignificance | VOUS |
| A027 | M | ICE1         | // | COMP HET | c.2170G>A   | p.Glu724Lys  | 5:5461617    | 0           | 19.29 | UncertainSignificance | VOUS |
| A027 | M | COL4A6       | // | HEM      | c.998T>A    | p.Ile333Asn  | X:107437768  | 0,000264901 | 21.9  | UncertainSignificance | VOUS |
| A027 | M | DCAF8L1      | // | HEM      | c.370G>A    | p.Gly124Ser  | X:27999082   | 0,000529801 | 0.007 | UncertainSignificance | LB   |
| A027 | M | LOC101059915 | // | HEM      | c.739C>T    | p.Arg247Cys  | X:70888392   | 0,000529801 | 0.665 | UncertainSignificance | LB   |
| A027 | M | HDX          | // | HEM      | c.269G>A    | p.Arg90Gln   | X:83724462   | 0           | 10.13 | UncertainSignificance | LB   |
| A028 | M | MAP3K15      | // | HEM      | c.2713G>A   | p.Glu905Lys  | X:19392655   | 1,68012E-05 | 18.30 | UncertainSignificance | VOUS |
| A029 | F | PRDM15       | // | COMP HET | c.1156C>A   | p.Leu386Ile  | 21:43279213  | 0           | 12.58 | UncertainSignificance | LB   |
| A029 | F | PRDM15       | // | COMP HET | c.295G>T    | p.Gly99Cys   | 21:43298922  | 0,000510269 | 13.99 | UncertainSignificance | LB   |
| A029 | F | AHNAK2       | // | COMP HET | c.14018A>T  | p.His4673Leu | 14:105407770 | 0,002304147 | 0.13  | UncertainSignificance | LB   |
| A029 | F | AHNAK2       | // | COMP HET | c.386C>G    | p.Thr129Arg  | 14:105421900 | 0,001181195 | 22.9  | UncertainSignificance | VOUS |
| A029 | F | REEP4        | // | COMP HET | c.345C>G    | p.Tyr115*    | 8:21997001   | 0           | 36.0  | UncertainSignificance | VOUS |
| A029 | F | REEP4        | // | COMP HET | c.116T>C    | p.Met39Thr   | 8:21997751   | 0,000116279 | 26.0  | UncertainSignificance | VOUS |
| A033 | M | MECP2        | 1  | HEM      | c.1160C>T   | p.Pro387Leu  | X:153296119  | 0,000264901 | 22.6  | LikelyBenign          | VOUS |
| A033 | M | EIF4ENIF1    | // | COMP HET | c.97G>A     | p.Glu33Lys   | 22:31867903  | 0,0045      | 32    | UncertainSignificance | VOUS |
| A033 | M | EIF4ENIF1    | // | COMP HET | c.865C>G    | p.Gln289Glu  | 22:31854560  | 0,0006      | 25.7  | UncertainSignificance | VOUS |
| A033 | M | PCDH15       | 2  | COMP HET | c.3502-8C>T |              | 10:55626625  | 0,006162791 | 0.206 | UncertainSignificance | VOUS |
| A033 | M | PCDH15       | 2  | COMP HET | c.2525A>G   | p.Glu842Gly  | 10:55782653  | 3,99527E-06 | 34    | UncertainSignificance | VOUS |
| A034 | M | CDKL5        | 1  | HEM      | c.2779T>A   | p.Ser927Thr  | X:18646773   | 4,76974E-05 | 18    | UncertainSignificance | VOUS |
| A034 | M | EP400        | 2  | COMP HET | c.8419C>G   | p.Pro2807Ala | 12:132549297 | 4,02411E-06 | 16.94 | UncertainSignificance | VOUS |
| A034 | M | EP400        | 2  | COMP HET | c.2057C>T   | p.Ser686Phe  | 12:132471186 | 0,000199681 | 20.7  | UncertainSignificance | LP   |
| A035 | M | SOX3         | // | HEM      | c.310G>A    | p.Gly104Arg  | X:139586916  | 0,00014     | 24.8  | UncertainSignificance | VOUS |
| A035 | M | UNC80        | 2  | COMP HET | c.92+7G>A   |              | 2:210636895  | 0,005643192 | 16.33 | UncertainSignificance | VOUS |
| A035 | M | UNC80        | 2  | COMP HET | c.8011C>A   | p.Leu2671Met | 2:210835634  | 0           | 24.7  | UncertainSignificance | VOUS |
| A037 | M | WDFY4        | 2  | COMP HET | c.2689A>C   | p.Ser897Arg  | 10:49982638  | 0,000191083 | 0,043 | UncertainSignificance | VOUS |
| A037 | M | WDFY4        | 2  | COMP HET | c.5114A>G   | p.Asn1705Ser | 10:50019653  | 0,000314268 | 0,275 | UncertainSignificance | VOUS |
| A037 | M | AKAP9        | 2  | HETdn    | c.1903G>A   | p.Glu635Lys  | 7:91631134   | 0           | 31    | UncertainSignificance | LP   |
| A038 | F | EPPK1        | 2  | COMP HET | c.6193T>A   | p.Tyr2065Asn | 8:144941229  | 0,004125413 | 22.5  | UncertainSignificance | VOUS |
| A038 | F | EPPK1        | 2  | COMP HET | c.5101G>A   | p.Val1701Met | 8:144942321  | 0,012664277 | 24.8  | UncertainSignificance | VOUS |
| A041 | M | CDKL5        | 1  | HEM      | c.826-6C>T  |              | X:18616576   | 4,91951E-05 | 13.9  | UncertainSignificance | VOUS |
| A041 | M | APBA2        | 2  | HETdn    | c.916A>G    | p.Thr306Ala  | 15:29347003  | 0           | 21.6  | UncertainSignificance | LP   |
| A041 | M | TAF1C        | 3  | COMP HET | c.1903G>A   | p.Gly635Ser  | 16:84213254  | 0,008618682 | 14.99 | UncertainSignificance | VOUS |
| A041 | M | TAF1C        | 3  | COMP HET | c.911C>T    | p.Ser304Phe  | 16:84215475  | 0,00372093  | 13.38 | UncertainSignificance | VOUS |
| A044 | M | NEXMIF       | 1  | HEM      | c.2472G>T   | p.Leu824Phe  | X:73961920   | 0           | 22.8  | UncertainSignificance | LP   |
| A044 | M | HIVEP3       | 2  | COMP HET | c.3235C>A   | p.Pro1079Thr | 1:42047234   | 0,000453926 | 0,078 | UncertainSignificance | VOUS |
| A044 | M | HIVEP3       | 2  | COMP HET | c.1600C>G   | p.Pro534Ala  | 1:42048869   | 0,000814143 | 19.39 | UncertainSignificance | VOUS |
| A044 | M | FAT1         | 2  | COMP HET | c.11497A>G  | p.Thr3833Ala | 4:187522566  | 0,000803484 | 24.3  | UncertainSignificance | VOUS |
| A044 | M | FAT1         | 2  | COMP HET | c.3252A>G   | p.Ile1084Met | 4:187627730  | 0,002123142 | 23.0  | UncertainSignificance | VOUS |
| A045 | M | CNGB3        | 2  | COMP HET | c.1578+1G>A |              | 8:87638210   | 0,00023     | 29.7  | UncertainSignificance | VOUS |
| A045 | M | CNGB3        | 2  | COMP HET | c.319G>A    | p.Gly107Arg  | 8:87738778   | 0,00093     | 10.15 | UncertainSignificance | VOUS |
| A046 | M | SCN9A        | 2  | COMP HET | c.3799C>G   | p.Leu1267Val | 2:167089942  | 0,002290813 | 24.5  | UncertainSignificance | VOUS |
| A046 | M | SCN9A        | 2  | COMP HET | c.2987G>A   | p.Arg996His  | 2:167129240  | 0,002213614 | 5.633 | UncertainSignificance | VOUS |
| A048 | M | CHD7         | 1  | HOM      | c.1018A>G   | p.Met340Val  | 8:61655009   | 0,007448342 | 16.20 | LikelyBenign          | VOUS |
| A049 | F | PTK7         | 1  | HOM      | c.19G>A     | p.Gly7Arg    | 6:43044640   | 0,009279337 | 14.55 | UncertainSignificance | VOUS |
| A049 | F | CNOT3        | 1  | HOM      | c.845C>T    | p.Ser282Phe  | 19:54650344  | 6,37105E-05 | 23.4  | LikelyBenign          | VOUS |
| A049 | F | AGAP2        | 2  | COMP HET | c.329T>C    | p.Met110Thr  | 12:58128166  | 0,00255814  | 25.1  | UncertainSignificance | VOUS |
| A049 | F | AGAP2        | 2  | COMP HET | c.966G>C    | p.Glu322Asp  | 12:58131064  | 8,11879E-06 | 21.4  | UncertainSignificance | VOUS |

|      |   |         |    |          |             |              |              |             |       |                       |      |
|------|---|---------|----|----------|-------------|--------------|--------------|-------------|-------|-----------------------|------|
| A050 | F | TBC1D24 | // | COMP HET | c.1349C>T   | p.Pro450Leu  | 16:2550333   | 0,00023855  | 8.261 | UncertainSignificance | LB   |
| A050 | F | TBC1D24 | // | COMP HET | c.1393G>A   | p.Ala465Thr  | 16:2550377   | 0,000209431 | 0.143 | UncertainSignificance | LB   |
| A051 | F | LRP1    | 2  | COMP HET | c.5795-8A>G |              | 12:57577550  | 0           | 5.981 | UncertainSignificance | VOUS |
| A051 | F | LRP1    | 2  | COMP HET | c.8304C>A   | p.His2768Gln | 12:57588880  | 0           | 16.97 | UncertainSignificance | VOUS |
| A051 | F | ANKMY1  | // | COMP HET | c.1879-1G>A |              | 2:241451419  | 0           | 22.5  | Pathogenic            | LP   |
| A051 | F | ANKMY1  | // | COMP HET | c.638A>G    | p.Asn213Ser  | 2:241468502  | 0,00047318  | 16.21 | UncertainSignificance | VOUS |
| A051 | F | SIDT2   | // | COMP HET | c.1601A>G   | p.Asn534Ser  | 11:117060989 | 0,000284154 | 23.9  | UncertainSignificance | VOUS |
| A051 | F | SIDT2   | // | COMP HET | c.2128C>T   | p.Arg710Cys  | 11:117063891 | 0,002793296 | 33    | UncertainSignificance | VOUS |
| A051 | F | SH3TC1  | // | COMP HET | c.284G>T    | p.Ser95Ile   | 4:8214464    | 1,21104E-05 | 19.47 | UncertainSignificance | VOUS |
| A051 | F | SH3TC1  | // | COMP HET | c.1684C>T   | p.Leu562Phe  | 4:8229105    | 0,001943418 | 23.9  | UncertainSignificance | VOUS |
| A051 | F | TBC1D9B | // | COMP HET | c.2455G>A   | p.Glu819Lys  | 5:179298491  | 0,00372093  | 32    | UncertainSignificance | VOUS |
| A051 | F | TBC1D9B | // | COMP HET | c.686C>G    | p.Ser229Cys  | 5:179320359  | 0,006395349 | 26.6  | UncertainSignificance | VOUS |
| A051 | F | ZSCAN21 | // | COMP HET | c.133C>A    | p.Arg45Ser   | 7:99654762   | 0,00019486  | 24.5  | UncertainSignificance | VOUS |
| A051 | F | ZSCAN21 | // | COMP HET | c.796G>A    | p.Val266Ile  | 7:99661614   | 0,000453926 | 13.48 | UncertainSignificance | LB   |
| A052 | F | ANK3    | 1  | COMP HET | c.2380G>T   | p.Asp794Tyr  | 10:61819543  | 0,006976744 | 20.1  | UncertainSignificance | VOUS |
| A052 | F | ANK3    | 1  | COMP HET | c.10055A>G  | p.Glu3352Gly | 10:61830584  | 0,005813953 | 21.0  | LikelyBenign          | VOUS |
| A052 | F | IQGAP3  | 2  | COMP HET | c.3277C>T   | p.Arg1093Cys | 1:156508605  | 3,18492E-05 | 32    | UncertainSignificance | VOUS |
| A052 | F | IQGAP3  | 2  | COMP HET | c.3056+1G>A |              | 1:156509165  | 0           | 25.8  | Pathogenic            | LP   |
| A052 | F | PDE4DIP | // | COMP HET | c.6905A>T   | p.Asn2302Ile | 1:144854565  | 0,001046512 | 17.31 | UncertainSignificance | VOUS |
| A052 | F | PDE4DIP | // | COMP HET | c.907G>C    | p.Val303Leu  | 1:144922261  | 0           | 24.3  | UncertainSignificance | VOUS |
| A053 | M | PHF8    | 5  | HEM      | c.1379T>A   | p.Ile460Asn  | X:54020281   | 1,09716E-05 | 21.9  | UncertainSignificance | LP   |
| A053 | M | FHDC1   | // | COMP HET | c.1453C>T   | p.Arg485Cys  | 4:153895896  | 0,000232558 | 16.23 | UncertainSignificance | VOUS |
| A053 | M | FHDC1   | // | COMP HET | c.2854G>A   | p.Ala952Thr  | 4:153897297  | 1,22245E-05 | 0.135 | UncertainSignificance | VOUS |
| A053 | M | PNPLA7  | 2  | COMP HET | c.1906G>A   | p.Gly636Arg  | 9:140391671  | 3,18492E-05 | 24.7  | UncertainSignificance | VOUS |
| A053 | M | PNPLA7  | 2  | COMP HET | c.1421G>A   | p.Arg474Gln  | 9:140396157  | 0,000798722 | 23.9  | UncertainSignificance | VOUS |
| A053 | M | RHOXF1  | 2  | HEM      | c.190G>A    | p.Gly64Ser   | X:119249583  | 1,17861E-05 | 14.60 | UncertainSignificance | VOUS |
| A054 | M | SYN1    | 1  | HEM      | c.1779A>C   | p.Lys593Asn  | X:47433604   | 0           | 18.03 | UncertainSignificance | VOUS |
| A054 | M | ADCY9   | // | COMP HET | c.2828+4C>T |              | 16:4027479   | 3,61485E-05 | 0.025 | UncertainSignificance | LB   |
| A054 | M | ADCY9   | // | COMP HET | c.2827A>G   | p.Ser943Gly  | 16:4027484   | 0           | 24.5  | UncertainSignificance | VOUS |
| A054 | M | ESPL1   | // | COMP HET | c.130G>T    | p.Ala44Ser   | 12:53662856  | 0           | 17.57 | UncertainSignificance | VOUS |
| A054 | M | ESPL1   | // | COMP HET | c.1846G>A   | p.Glu616Lys  | 12:53670549  | 0,000127405 | 28.7  | UncertainSignificance | VOUS |
| A054 | M | FAM47A  | 2  | HEM      | c.1499G>A   | p.Arg500Gln  | X:34148897   | 0,000148876 | 14.68 | UncertainSignificance | VOUS |
| A055 | M | SYNE1   | 2S | COMP HET | c.6521C>T   | p.Thr2174Ile | 6:152730222  | 0,001264816 | 19.00 | UncertainSignificance | VOUS |
| A055 | M | SYNE1   | 2S | COMP HET | c.4822G>A   | p.Ala1608Thr | 6:152749494  | 0,001627907 | 0.813 | UncertainSignificance | VOUS |
| A056 | M | MCPH1   | 2  | HETdn    | c.1477C>T   | p.Arg493Cys  | 8:6302720    | 3,18451E-05 | 0.001 | UncertainSignificance | VOUS |
| A057 | M | MAGEE2  | // | HEM      | c.181G>A    | p.Ala61Thr   | X:75004706   | 0           | 8.479 | UncertainSignificance | VOUS |
| A057 | M | KDM6B   | 1  | COMP HET | c.1925C>T   | p.Pro642Leu  | 17:7751531   | 0,003947052 | 22.1  | UncertainSignificance | VOUS |
| A057 | M | KDM6B   | 1  | COMP HET | c.2638C>G   | p.Arg880Gly  | 17:7752244   | 0,000480307 | 23.5  | UncertainSignificance | VOUS |
| A058 | M | MAGEE2  | // | HEM      | c.181G>A    | p.Ala61Thr   | X:75004706   | 0           | 8.479 | UncertainSignificance | VOUS |
| A059 | M | MAGEE2  | // | HEM      | c.181G>A    | p.Ala61Thr   | X:75004706   | 0           | 8.479 | UncertainSignificance | VOUS |
| A060 | M | MAP7D2  | // | HEM      | c.619A>G    | p.Met207Val  | X:20069041   | 6,25006E-05 | 8.170 | UncertainSignificance | LB   |
| A060 | M | BIRC6   | 2  | HETdn    | c.1687C>A   | p.Pro563Thr  | 2:32640046   | 0           | 23.3  | UncertainSignificance | VOUS |
| A060 | M | DDX53   | 2  | HEM      | c.1678C>T   | p.Arg560Trp  | X:23019852   | 5,5001E-06  | 23.3  | UncertainSignificance | VOUS |
| A062 | M | RNF19A  | // | COMP HET | c.1147A>G   | p.Ile383Val  | 8:101281057  | 0,000453926 | 18.61 | UncertainSignificance | VOUS |
| A062 | M | RNF19A  | // | COMP HET | c.1202G>A   | p.Arg401His  | 8:101277003  | 0,001395349 | 26.2  | UncertainSignificance | VOUS |
| A064 | F | RGSL1   | // | HETdn    | c.2705A>T   | p.Gln902Leu  | 1:182517487  | 0           | 9.319 | Likelypathogenic      | VOUS |
| A066 | F | CGNL1   | 2  | COMP HET | c.1702A>G   | p.Thr568Ala  | 15:57734575  | 0,00729927  | 2.937 | LikelyBenign          | LB   |
| A066 | F | CGNL1   | 2  | COMP HET | c.3049A>G   | p.Met1017Val | 15:57820861  | 0,004310345 | 14.17 | LikelyBenign          | LB   |
| A066 | F | LTK     | // | COMP HET | c.2416G>A / | p.Gly806Arg  | 15:41796373  | 0,00012     | 14.82 | UncertainSignificance | VOUS |
| A066 | F | LTK     | // | COMP HET | c.1237G>A / | p.Val413Ile  | 15:41800279  | 0,000064    | 14.39 | UncertainSignificance | VOUS |
| A067 | M | GPHN    | 2  | HOM      | c.26C>G     | p.Thr9Ser    | 14:66975271  | 0,001976744 | 21.7  | LikelyBenign          | VOUS |
| A067 | M | SYNE1   | 2S | HETdn    | c.18481G>A  | p.Glu6161Lys | 6:152599316  | 0,00        | 23.9  | LikelyBenign          | VOUS |
| A068 | F | EPPK1   | 2  | COMP HET | c.5893C>T   | p.Arg1965Trp | 8:144941529  | 0,000597086 | 22.9  | UncertainSignificance | VOUS |

|      |   |          |    |          |                    |                 |              |             |       |                       |      |
|------|---|----------|----|----------|--------------------|-----------------|--------------|-------------|-------|-----------------------|------|
| A068 | F | EPPK1    | 2  | COMP HET | c.5101G>A          | p.Val1701Met    | 8:144942321  | 0,012664277 | 24.8  | UncertainSignificance | VOUS |
| A068 | F | CASZ1    | 1  | COMP HET | c.845C>T           | p.Thr282Met     | 1:10720254   | 0,008025122 | 22.4  | LikelyBenign          | VOUS |
| A068 | F | CASZ1    | 1  | COMP HET | c.794T>C           | p.Val265Ala     | 1:10720305   | 0,009767442 | 1.032 | LikelyBenign          | LB   |
| A069 | M | MCF2     | // | HEM      | c.911T>C           | p.Leu304Pro     | X:138701822  | 0           | 23.9  | UncertainSignificance | VOUS |
| A069 | M | CLDN34   | // | HEM      | c.604C>A           | p.Pro202Thr     | X:9936001    | 0           | 9.123 | UncertainSignificance | VOUS |
| A070 | M | LRCH2    | // | HEM      | c.1415A>G          | p.Asp472Gly     | X:114398287  | 0           | 24.7  | UncertainSignificance | VOUS |
| A070 | M | ABCA13   | 2  | COMP HET | c.9236A>G          | p.Lys3079Arg    | 7:48337999   | 8,07735E-06 | 0.036 | LikelyBenign          | LB   |
| A070 | M | ABCA13   | 2  | COMP HET | c.14185C>T         | p.Arg4729Cys    | 7:48563977   | 0,000611247 | 7.439 | LikelyBenign          | LB   |
| A070 | M | TAF6     | 2  | HOM      | c.2122G>A          | p.Gly708Ser     | 7:99704892   | 0,005138986 | 13.50 | LikelyBenign          | LB   |
| A070 | M | SLITRK4  | // | HEM      | c.799G>A           | p.Gly267Ser     | X:142718126  | 0,000264901 | 22.1  | LikelyBenign          | VOUS |
| A070 | M | SUPV3L1  | // | HOM      | c.505A>G           | p.Ile169Val     | 10:70947445  | 3,19244E-05 | 20.5  | UncertainSignificance | VOUS |
| A070 | M | DST      | 2  | COMP HET | c.11924A>G         | p.Asp3975Gly    | 6:56382072   | 0           | 32    | UncertainSignificance | VOUS |
| A070 | M | DST      | 2  | COMP HET | c.7534G>C          | p.Gly2512Arg    | 6:56480731   | 3,9807E-06  | 15.90 | UncertainSignificance | VOUS |
| A071 | M | AGBL4    | 2  | COMP HET | c.101G>T           | p.Gly34Val      | 1:50317124   | 0,007225434 | 24.6  | UncertainSignificance | VOUS |
| A071 | M | AGBL4    | 2  | COMP HET | c.-41C>T           |                 | 1:50489509   | 0,003612717 | 11.71 | UncertainSignificance | VOUS |
| A071 | M | STXBP5   | 2  | COMP HET | c.787A>G           | p.Ile263Val     | 6:147599289  | 0,002269632 | 16.80 | UncertainSignificance | VOUS |
| A071 | M | STXBP5   | 2  | COMP HET | c.1505A>G          | p.Tyr502Cys     | 6:147636753  | 0,005813953 | 21.3  | LikelyBenign          | VOUS |
| A072 | M | AGBL4    | 2  | COMP HET | c.101G>T           | p.Gly34Val      | 1:50317124   | 0,007225434 | 24.6  | UncertainSignificance | VOUS |
| A072 | M | AGBL4    | 2  | COMP HET | c.-41C>T           |                 | 1:50489509   | 0,003612717 | 11.71 | UncertainSignificance | VOUS |
| A073 | M | AGBL4    | 2  | COMP HET | c.101G>T           | p.Gly34Val      | 1:50317124   | 0,007225434 | 24.6  | UncertainSignificance | VOUS |
| A073 | M | AGBL4    | 2  | COMP HET | c.-41C>T           |                 | 1:50489509   | 0,003612717 | 11.71 | UncertainSignificance | VOUS |
| A074 | M | MTUS1    | // | COMP HET | c.1655T>C          | p.Val552Ala     | 8:17611662   | 0,000116345 | 7.077 | UncertainSignificance | LB   |
| A074 | M | MTUS1    | // | COMP HET | c.312G>T           | p.Gln104His     | 8:17613005   | 0,000727096 | 14.94 | LikelyBenign          | LB   |
| A074 | M | KIF15    | // | COMP HET | c.1502G>T          | p.Arg501Leu     | 3:44843459   | 0,003439271 | 27.1  | LikelyBenign          | VOUS |
| A074 | M | KIF15    | // | COMP HET | c.4020T>G          | p.Asn1340Lys    | 3:44893747   | 3,97985E-06 | 23.3  | UncertainSignificance | VOUS |
| A075 | F | EP400    | 2  | HOM      | c.8181_8182insGCAG | p.Gln2728fs*255 | 12:132547093 | 0           | 26.9  | LikelyPathogenic      | LP   |
| A075 | F | KIF13B   | 2  | COMP HET | c.3821A>G          | p.Asn1274Ser    | 8:28974364   | 0,0261916   | 9.538 | LikelyBenign          | LB   |
| A075 | F | KIF13B   | 2  | COMP HET | c.2411A>G          | p.Asn804Ser     | 8:28998058   | 0,00103146  | 24.9  | UncertainSignificance | VOUS |
| A075 | F | YIF1A    | // | HETdn    | c.19T>C            | p.Tyr7His       | 11:66056438  | 6,41067E-05 | 25.0  | UncertainSignificance | VOUS |
| A076 | M | FTSJ1    | // | HEM      | c.111A>C           | p.Gln37His      | X:48336546   | 5,75E-06    | 0.845 | LikelyBenign          | LB   |
| A076 | M | STAB1    | // | HETdn    | c.3357_3358insC    | p.Arg1122fs*36  | 3:52547907   | 0,00140647  | 32    | UncertainSignificance | VOUS |
| A076 | M | DGKB     | // | HETdn    | c.2207C>T          | p.Ala736Val     | 7:14217695   | 0           | 32    | LikelyPathogenic      | LP   |
| A076 | M | ACTR5    | // | COMP HET | c.911G>A           | p.Arg304Gln     | 20:37383735  | 1,1957E-05  | 34.0  | UncertainSignificance | VOUS |
| A076 | M | ACTR5    | // | COMP HET | c.1697A>G          | p.Lys566Arg     | 20:37400332  | 1,19301E-05 | 22.3  | UncertainSignificance | VOUS |
| A076 | M | WAS      | // | HEM      | c.724A>T           | p.Ser242Cys     | X:48545334   | 8,46131E-05 | 24.7  | UncertainSignificance | VOUS |
| A077 | M | IL1RAPL1 | 2  | HEM      | c.261G>C           | p.Glu87Asp      | X:29301233   | 1,09092E-05 | 22.9  | LikelyBenign          | VOUS |
| A077 | M | HECTD4   | 1  | COMP HET | c.11749G>A         | p.Gly3917Ser    | 12:112607364 | 0           | 23.2  | UncertainSignificance | VOUS |
| A077 | M | HECTD4   | 1  | COMP HET | c.4112-5dupT       |                 | 12:112681817 | 0,00259585  | 10.95 | UncertainSignificance | VOUS |
| A077 | M | ACTN4    | 3  | COMP HET | c.1443-4G>A        |                 | 19:39214250  | 0,000199681 | 7.064 | UncertainSignificance | VOUS |
| A077 | M | ACTN4    | 3  | COMP HET | c.2680G>A          | p.Gly894Ser     | 19:39220016  | 0,014       | 24.9  | UncertainSignificance | VOUS |
| A078 | M | POPDC2   | // | HETdn    | c.126G>C           | p.Met42Ile      | 3:119379145  | 0           | 27.2  | LikelyPathogenic      | LP   |
| A078 | M | MSC      | // | HETdn    | c.100G>A           | p.Val34Ile      | 8:72756314   | 0           | 15.69 | LikelyPathogenic      | VOUS |
| A078 | M | MOCS2    | // | HOM      | c.14G>A            | p.Cys5Tyr       | 5:52405546   | 3,12e-4     | 17.43 | UncertainSignificance | LP   |
| A079 | M | SMARCA1  | // | HEM      | c.3079A>T          | p.Asn1027Tyr    | X:128582372  | 5,50E-06    | 24.6  | UncertainSignificance | LP   |
| A079 | M | DDX20    | // | COMP HET | c.25G>A            | p.Gly9Arg       | 1:112298571  | 0           | 15.74 | UncertainSignificance | VOUS |
| A079 | M | DDX20    | // | COMP HET | c.412C>T           | p.Pro138Ser     | 1:112302037  | 1,27294E-05 | 26.5  | UncertainSignificance | VOUS |
| A079 | M | RHBDD3   | // | COMP HET | c.968C>T           | p.Ser323Phe     | 22:29656330  | 3,679E-05   | 32    | UncertainSignificance | VOUS |
| A079 | M | RHBDD3   | // | COMP HET | c.512delG          | p.Gly171fs*40   | 22:29659843  | 0,002240478 | 32    | UncertainSignificance | VOUS |
| A079 | M | BSN      | // | COMP HET | c.4585A>G          | p.Met1529Val    | 3:49691574   | 0,000116279 | 18.19 | UncertainSignificance | VOUS |
| A079 | M | BSN      | // | COMP HET | c.9256C>T          | p.Pro3086Ser    | 3:49698534   | 0           | 11.89 | UncertainSignificance | LB   |
| A079 | M | LUZP4    | // | HEM      | c.21A>G            | p.Ile7Met       | X:114536613  | 1,16158E-05 | 0.372 | UncertainSignificance | VOUS |
| A080 | M | PNCK     | // | HEM      | c.1189G>C          | p.Gly397Arg     | X:152936004  | 0,000148721 | 24.0  | LikelyBenign          | VOUS |
| A080 | M | SPAST    | 1  | COMP HET | c.415+4A>G         |                 | 2:32289319   | 0           | 15.95 | UncertainSignificance | VOUS |

|      |   |              |    |          |                      |                      |              |             |       |                       |      |
|------|---|--------------|----|----------|----------------------|----------------------|--------------|-------------|-------|-----------------------|------|
| A080 | M | SPAST        | 1  | COMP HET | c.870+8delG          |                      | 2:32339901   | 3,9814E-06  | 1.412 | UncertainSignificance | VOUS |
| A080 | M | FAAP100      | // | HETdn    | c.1435C>T            | p.Arg479Trp          | 17:79514673  | 0,000116279 | 29.6  | LikelyBenign          | VOUS |
| A080 | M | ARHGEF11     | // | COMP HET | c.1912G>C            | p.Asp638His          | 1:156918184  | 3,97687E-06 | 29.2  | UncertainSignificance | VOUS |
| A080 | M | ARHGEF11     | // | COMP HET | c.329A>G             | p.Lys110Arg          | 1:156949023  | 0           | 25.5  | UncertainSignificance | VOUS |
| A080 | M | RABGAP1L     | // | COMP HET | c.1220G>A            | p.Arg407His          | 1:174247814  | 7,99329E-06 | 32    | UncertainSignificance | VOUS |
| A080 | M | RABGAP1L     | // | COMP HET | c.878C>T             | p.Ser293Leu          | 1:174957893  | 0           | 22.9  | UncertainSignificance | VOUS |
| A080 | M | C1QTNF7      | // | HETdn    | c.716C>T             | p.Ser239Leu          | 4:15444248   | 1,98915E-05 | 29.9  | UncertainSignificance | VOUS |
| A082 | M | KLHDC7A      | // | HETdn    | c.650delG            | p.Ser217fs*2         | 1:18808124   | 0           | 22.3  | LikelyPathogenic      | VOUS |
| A082 | M | WDFY3        | 1  | COMP HET | c.9726+3A>G          |                      | 4:85605093   | 0           | 12.65 | UncertainSignificance | VOUS |
| A082 | M | WDFY3        | 1  | COMP HET | c.5189-7C>G          |                      | 4:85678321   | 0,000530815 | 11.43 | UncertainSignificance | VOUS |
| A083 | M | LOC101059915 | // | HEM      | c.604delG            | p.Leu203fs*0         | X:70888256   | 0,0010596   | 0.022 | UncertainSignificance | LB   |
| A083 | M | TKTL1        | // | HEM      | c.950A>C             | p.His317Pro          | X:153549192  | 0           | 14.76 | UncertainSignificance | VOUS |
| A084 | M | VCX3B        | // | HEM      | c.188C>T             | p.Thr63Met           | X:8433871    | 0,000082    | 0.076 | UncertainSignificance | LB   |
| A084 | M | ERAS         | // | HEM      | c.91C>T              | p.Arg31Cys           | X:48687624   | 6,94845E-05 | 12.29 | LikelyBenign          | LB   |
| A084 | M | CHIC1        | // | HEM      | c.611A>C             | p.Asn204Thr          | X:72899535   | 9,18063E-05 | 26.3  | LikelyBenign          | VOUS |
| A084 | M | COL16A1      | // | COMP HET | c.4027C>T            | p.Pro1343Ser         | 1:32122663   | 0,000119076 | 24.9  | UncertainSignificance | VOUS |
| A084 | M | COL16A1      | // | COMP HET | c.280C>T             | p.Arg94Trp           | 1:32164194   | 0,000724638 | 24.1  | LikelyBenign          | VOUS |
| A084 | M | PASK         | 3  | COMP HET | c.1838A>G            | p.Tyr613Cys          | 2:242066492  | 0,000232558 | 9.502 | UncertainSignificance | VOUS |
| A084 | M | PASK         | 3  | COMP HET | c.1576G>A            | p.Gly526Arg          | 2:242066754  | 0,000697674 | 0.011 | UncertainSignificance | VOUS |
| A086 | M | CETN2        | // | HEM      | c.2T>C               | p.Met1?              | X:151999253  | 3,16704E-05 | 22.5  | UncertainSignificance | VOUS |
| A087 | M | BCORL1       | S  | HEM      | c.3371A>G            | p.Glu1124Gly         | X:129150119  | 5,51557E-06 | 19.40 | LikelyBenign          | VOUS |
| A087 | M | NEXMIF       | 1  | HEM      | c.1777_1779delAAG    | p.Lys593del          | X:73962612   | 2,74832E-05 | 17.57 | UncertainSignificance | VOUS |
| A088 | M | KLHL34       | // | HEM      | c.1507G>A            | p.Glu503Lys          | X:21674400   | 3,74462E-05 | 18.80 | LikelyBenign          | LB   |
| A088 | M | TAF1         | S  | HEM      | c.3005C>T            | p.Pro1002Leu         | X:70612738   | 4,59601E-05 | 22.6  | LikelyBenign          | VOUS |
| A088 | M | CAMK2D       | // | HETdn    | c.493C>T             | p.Gln165*            | 4:114458521  | 0           | 40    | LikelyPathogenic      | LP   |
| A093 | M | PLXNA3       | 2  | HEM      | c.524C>T             | p.Ser175Leu          | X:153689047  | 0,000264901 | 25.1  | UncertainSignificance | VOUS |
| A093 | M | SMYD1        | // | COMP HET | c.17_18delITG        | p.Met6fs*8           | 2:88367399   | 0           | 34    | UncertainSignificance | LP   |
| A093 | M | SMYD1        | // | COMP HET | c.1253A>G            | p.Lys418Arg          | 2:88407997   | 0,000813953 | 22.0  | UncertainSignificance | VOUS |
| A094 | M | PDE4DIP      | // | COMP HET | c.5341C>T            | p.Leu1781Phe         | 1:144868098  | 0,000599042 | 14.48 | UncertainSignificance | VOUS |
| A094 | M | PDE4DIP      | // | COMP HET | c.1546C>T            | p.Leu516Phe          | 1:144921972  | 0,000116387 | 25.6  | UncertainSignificance | VOUS |
| A095 | M | TRIM35       | // | COMP HET | c.1279C>T            | p.Arg427Cys          | 8:27145270   | 0,000399361 | 31    | UncertainSignificance | VOUS |
| A095 | M | TRIM35       | // | COMP HET | c.1007C>T            | p.Pro336Leu          | 8:27145542   | 8,01533E-06 | 25.7  | UncertainSignificance | VOUS |
| A095 | M | LRBA         | 2  | HETdn    | c.3656C>G            | p.Thr1219Ser         | 4:151773206  | 0           | 6.985 | LikelyPathogenic      | VOUS |
| A096 | F | GALNT8       | 2  | COMP HET | c.151A>G             | p.Lys51Glu           | 12:4829994   | 3,98E-06    | 5.002 | UncertainSignificance | VOUS |
| A096 | F | GALNT8       | 2  | COMP HET | c.1241A>G            | p.His414Arg          | 12:4870191   | 0           | 14.77 | UncertainSignificance | VOUS |
| A096 | F | TAF6         | 2  | HETdn    | c.1442C>T            | p.Thr481Ile          | 7:99706006   | 0           | 24.8  | LikelyPathogenic      | LP   |
| A097 | M | RNF220       | // | HETdn    | c.261delIT           | p.Phe88fs*16         | 1:44878029   | 0           | 29.7  | LikelyPathogenic      | LP   |
| A099 | M | PLXNA3       | 2  | HEM      | c.859G>A             | p.Val287Met          | X:153689703  | 0,000148633 | 20.5  | LikelyBenign          | VOUS |
| A100 | M | SAGE1        | // | HEM      | c.2306G>C            | p.Ser769Thr          | X:134993897  | 0           | 16.48 | UncertainSignificance | VOUS |
| A100 | M | RNF25        | 2  | HOM      | c.620A>C             | p.Tyr207Ser          | 2:219529924  | 0,005232558 | 25.5  | LikelyBenign          | VOUS |
| A100 | M | DOCK5        | // | HETdn    | c.778A>T             | p.Ile260Phe          | 8:25158105   | 0           | 23.9  | LikelyPathogenic      | LP   |
| A100 | M | SPPL2C       | // | COMP HET | c.511G>A             | p.Val171Ile          | 17:43922783  | 3,18613E-05 | 1.584 | UncertainSignificance | LB   |
| A100 | M | SPPL2C       | // | COMP HET | c.1716_1719delIAGAC  | p.Asp573fs*51        | 17:43923987  | 0,001172608 | 24.3  | UncertainSignificance | VOUS |
| A100 | M | CSMD1        | 2  | COMP HET | c.1223-5T>C          |                      | 8:3432593    | 4,04E-06    | 10.87 | UncertainSignificance | VOUS |
| A100 | M | CSMD1        | 2  | COMP HET | c.1184C>T            | p.Thr395Met          | 8:3443696    | 0,000258264 | 15.38 | UncertainSignificance | VOUS |
| A101 | M | ARHGAP6      | // | HEM      | c.1524A>G            | p.Ile508Met          | X:11196325   | 0           | 21.2  | UncertainSignificance | VOUS |
| A102 | M | IL1RAPL1     | 2  | HEM      | c.11C>T              | p.Pro4Leu            | X:28807471   | 0,000136475 | 21.5  | LikelyBenign          | VOUS |
| A102 | M | COPSS        | // | HETdn    | c.643G>A             | p.Gly215Ser          | 8:67968770   | 0           | 32    | LikelyPathogenic      | LP   |
| A102 | M | CES3         | // | COMP HET | c.422G>A             | p.Arg141Lys          | 16:66997528  | 3,18613E-05 | 6.518 | UncertainSignificance | LB   |
| A102 | M | CES3         | // | COMP HET | c.506G>A             | p.Gly169Glu          | 16:66997784  | 0,000909091 | 12.04 | UncertainSignificance | LB   |
| A103 | M | EP400        | 2  | COMP HET | c.3469G>A            | p.Val1157Ile         | 12:132497581 | 0,004534884 | 12.97 | LikelyBenign          | LB   |
| A103 | M | EP400        | 2  | COMP HET | c.8223_8224insCAGCAA | p.Gln2741_Gln2742dup | 12:132547135 | 0,000321048 | 14.27 | UncertainSignificance | VOUS |
| A103 | M | LILRB2       | 2  | COMP HET | c.940G>A             | p.Asp314Asn          | 19:54782682  | 0,005368441 | 23.2  | LikelyBenign          | VOUS |

|      |   |         |    |          |                  |               |              |             |       |                       |      |
|------|---|---------|----|----------|------------------|---------------|--------------|-------------|-------|-----------------------|------|
| A103 | M | LILRB2  | 2  | COMP HET | c.67A>G          | p.Thr23Ala    | 19:54784122  | 0,0227636   | 4.512 | UncertainSignificance | VOUS |
| A104 | M | GPC4    | 2  | HEM      | c.1388G>A        | p.Arg463His   | X:132437274  | 9,11328E-05 | 25.1  | LikelyBenign          | VOUS |
| A105 | M | SYN1    | 1  | HEM      | c.1970A>C        | p.His657Pro   | X:47433413   | 0           | 23.4  | UncertainSignificance | LP   |
| A107 | M | CACNA1F | 2  | HEM      | c.795G>C         | p.Lys265Asn   | X:49086704   | 0,000148633 | 24.3  | LikelyBenign          | VOUS |
| A108 | M | CTTNBP2 | 2  | HETdn    | c.1725_1726delAG | p.Ala577fs*2  | 7:117431523  | 0           | 34    | LikelyPathogenic      | P    |
| A108 | M | CASR    | // | HETdn    | c.102_103insG    | p.Leu37fs*10  | 3:121973138  | 0           | 32    | UncertainSignificance | LP   |
| A109 | M | SYNE1   | 2S | COMP HET | c.25469T>C       | p.Leu8490Pro  | 6:152457799  | 1,19405E-05 | 27.4  | UncertainSignificance | VOUS |
| A109 | M | SYNE1   | 2S | COMP HET | c.17567C>T       | p.Pro5856Leu  | 6:152615165  | 0,000226963 | 17.07 | UncertainSignificance | VOUS |
| A109 | M | SYNE1   | 2S | COMP HET | c.12261G>C       | p.Arg4087Ser  | 6:152658030  | 3,97769E-06 | 23.6  | UncertainSignificance | VOUS |
| A109 | M | SYNE1   | 2S | COMP HET | c.10043T>C       | p.Val3348Ala  | 6:152686105  | 0,028597367 | 22.5  | LikelyBenign          | VOUS |
| A109 | M | EP400   | 2  | COMP HET | c.5324G>T        | p.Ser1775Ile  | 12:132512776 | 0,007943713 | 8.32  | LikelyBenign          | LB   |
| A109 | M | EP400   | 2  | COMP HET | c.8399C>T        | p.Ala2800Val  | 12:132549277 | 0,000199681 | 23.4  | UncertainSignificance | VOUS |
| A110 | M | GPR50   | // | HEM      | c.1142G>A        | p.Arg381His   | X:150349197  | 5,49949E-06 | 2.745 | LikelyBenign          | LB   |
| A110 | M | CASZ1   | 1  | HOM      | c.794T>C         | p.Val265Ala   | 1:10720305   | 0,009767442 | 1.032 | LikelyBenign          | LB   |
| A110 | M | RAI1    | 1  | COMP HET | c.131G>A         | p.Arg44Gln    | 17:17696393  | 0,000599042 | 24.6  | UncertainSignificance | LP   |
| A110 | M | RAI1    | 1  | COMP HET | c.2939C>A        | p.Ala980Asp   | 17:17699201  | 0,000116306 | 23.2  | UncertainSignificance | LP   |
| A110 | M | BAHCC1  | // | COMP HET | c.379G>A         | p.Val127Met   | 17:79408925  | 0,000606649 | 9.539 | UncertainSignificance | LB   |
| A110 | M | BAHCC1  | // | COMP HET | c.6070G>A        | p.Gly2024Ser  | 17:79427678  | 0,000399361 | 1.298 | UncertainSignificance | LB   |
| A111 | M | ABCA13  | 2  | COMP HET | c.10202A>T       | p.Tyr3401Phe  | 7:48378050   | 0           | 13.71 | LikelyBenign          | LB   |
| A111 | M | ABCA13  | 2  | COMP HET | c.14200A>T       | p.Ile4734Phe  | 7:48563992   | 6,05175E-05 | 16.86 | LikelyBenign          | VOUS |
| A111 | M | LLGL1   | // | COMP HET | c.382G>A         | p.Asp128Asn   | 17:18136106  | 0           | 24.3  | UncertainSignificance | VOUS |
| A111 | M | LLGL1   | // | COMP HET | c.329G>A         | p.Cys110Tyr   | 17:18136053  | 7,95E-06    | 17.45 | UncertainSignificance | VOUS |
| A112 | M | RPA4    | // | HEM      | c.620G>A         | p.Arg207His   | X:96139929   | 0           | 11.03 | UncertainSignificance | VOUS |
| A112 | M | FOCAD   | // | COMP HET | c.3337A>T        | p.Met1113Leu  | 9:20933032   | 0           | 18.20 | UncertainSignificance | VOUS |
| A112 | M | FOCAD   | // | COMP HET | c.4440A>C        | p.Glu1480Asp  | 9:20981487   | 0           | 15.21 | UncertainSignificance | VOUS |
| A112 | M | ANOS1   | // | HEM      | c.1138T>C        | p.Trp380Arg   | X:8536342    | 0           | 24.3  | UncertainSignificance | LP   |
| A112 | M | SYTL4   | // | HEM      | c.428A>G         | p.Lys143Arg   | X:99956224   | 0           | 10.52 | UncertainSignificance | VOUS |
| A114 | M | CDH22   | 2  | HETdn    | c.673G>A         | p.Val225Ile   | 20:44845630  | 0,000199681 | 14.58 | LikelyBenign          | VOUS |
| A115 | M | ABC7    | // | HEM      | c.10C>T          | p.Leu4Phe     | X:74376098   | 0           | 23.6  | UncertainSignificance | VOUS |
| A116 | M | CTPS2   | // | HEM      | c.1442G>A        | p.Arg481Gln   | X:16638407   | 1,10434E-05 | 26.5  | UncertainSignificance | VOUS |
| A116 | M | ANK2    | 1  | COMP HET | c.877G>A         | p.Asp293Asn   | 4:114163351  | 0,000115342 | 27.6  | UncertainSignificance | VOUS |
| A116 | M | ANK2    | 1  | COMP HET | c.8979A>G        | p.Ile2993Met  | 4:114278753  | 0,002950522 | 0.170 | UncertainSignificance | VOUS |
| A117 | M | SPTBN5  | // | COMP HET | c.8836G>A        | p.Glu2946Lys  | 15:42148769  | 1,85242E-05 | 22.1  | UncertainSignificance | VOUS |
| A117 | M | SPTBN5  | // | COMP HET | c.1829T>C        | p.Leu610Pro   | 15:42175257  | 4,98927E-06 | 24.4  | UncertainSignificance | VOUS |
| A118 | M | GEMIN4  | // | COMP HET | c.2845C>T        | p.Arg949Cys   | 17:648438    | 0,00129199  | 22.6  | UncertainSignificance | VOUS |
| A118 | M | GEMIN4  | // | COMP HET | c.812C>T         | p.Thr271Met   | 17:650471    | 0,00023116  | 23.6  | UncertainSignificance | VOUS |
| A118 | M | GABBR1  | // | HETdn    | c.1939dupC       | p.Leu647fs*28 | 6:29576430   | 0           | 34    | LikelyPathogenic      | LP   |
| A120 | M | CXorf58 | // | HEM      | c.116+1G>A       |               | X:23928536   | 9,11037E-05 | 23    | UncertainSignificance | VOUS |
| A120 | M | ARID1B  | 1  | COMP HET | c.364_366delCAG  | p.Gln122del   | 6:157099426  | 0,033088235 | 18.27 | LikelyBenign          | VOUS |
| A120 | M | ARID1B  | 1  | COMP HET | c.2986+6C>T      |               | 6:157488325  | 0,005470205 | 3.74  | UncertainSignificance | VOUS |
| A120 | M | LRP2    | 2  | HETdn    | c.6954C>A        | p.Asp2318Glu  | 2:170063276  | 0           | 23.2  | LikelyPathogenic      | LP   |
| A120 | M | DST     | 2  | COMP HET | c.12220C>T       | p.Arg4074Cys  | 6:56362659   | 8,19101E-06 | 32.0  | UncertainSignificance | VOUS |
| A120 | M | DST     | 2  | COMP HET | c.772C>T         | p.Pro258Ser   | 6:56515753   | 4,02117E-06 | 21.9  | UncertainSignificance | VOUS |
| A121 | F | SCN2A   | 1  | HETdn    | c.5148G>T        | p.Trp1716Cys  | 2:166245464  | 0           | 33    | LikelyPathogenic      | P    |
| A122 | M | NSDHL   | // | HEM      | c.263G>A         | p.Arg88Gln    | X:152018963  | 2,1823E-05  | 11.90 | UncertainSignificance | VOUS |
| A122 | M | MXRA5   | // | HEM      | c.6328C>A        | p.Arg2110Ser  | X:3235394    | 0           | 24.8  | UncertainSignificance | VOUS |
| A123 | F | DCAF1   | // | HETdn    | c.2270C>T        | p.Ala757Val   | 3:51457995   | 0           | 25    | UncertainSignificance | VOUS |
| A124 | M | TSC2    | 1  | COMP HET | c.1318G>A        | p.Gly440Ser   | 16:2112558   | 0,001627907 | 25.1  | UncertainSignificance | VOUS |
| A124 | M | TSC2    | 1  | COMP HET | c.5378G>A        | p.Arg1793Gln  | 16:2138565   | 0,000145605 | 26.4  | UncertainSignificance | VOUS |
| A124 | M | HECW2   | 2  | HETdn    | c.3493C>T        | p.Arg1165Cys  | 2:197118680  | 3,1837E-05  | 32    | LikelyPathogenic      | P    |
| A125 | M | GABRE   | // | HEM      | c.983G>A         | p.Arg328His   | X:151123994  | 1,09154E-05 | 23.6  | UncertainSignificance | LP   |
| A125 | M | KDM6B   | 1  | COMP HET | c.2477C>G        | p.Ser826Cys   | 17:7752083   | 0,000116306 | 23.7  | LikelyBenign          | VOUS |
| A125 | M | KDM6B   | 1  | COMP HET | c.3431G>A        | p.Arg1144His  | 17:7753037   | 2,03618E-05 | 29.0  | LikelyBenign          | VOUS |

|      |   |         |    |          |                    |                          |             |             |       |                       |      |
|------|---|---------|----|----------|--------------------|--------------------------|-------------|-------------|-------|-----------------------|------|
| A125 | M | ZNF462  | 1  | COMP HET | c.3500C>T          | p.Pro1167Leu             | 9:109689693 | 3,99288E-06 | 23    | UncertainSignificance | LP   |
| A125 | M | ZNF462  | 1  | COMP HET | c.5077A>G          | p.Lys1693Glu             | 9:109691270 | 0           | 25.5  | UncertainSignificance | LP   |
| A128 | M | SYNE1   | 2S | COMP HET | c.15238G>A         | p.Val5080Met             | 6:152646425 | 0,000998393 | 15.88 | LikelyBenign          | LB   |
| A128 | M | SYNE1   | 2S | COMP HET | c.4631G>A          | p.Arg1544Gln             | 6:152751696 | 0,00459265  | 18.42 | LikelyBenign          | LB   |
| A129 | M | MAOB    | 2  | HEM      | c.1558G>A          | p.Val520Ile              | X:43626718  | 0           | 0.003 | UncertainSignificance | VOUS |
| A129 | M | SYTL4   | // | HEM      | c.540-1G>A         |                          | X:99946207  | 0,000149316 | 29.3  | UncertainSignificance | VOUS |
| A130 | M | PLEKHA2 | // | HETdn    | c.689_690insC      | p.Lys231fs*2             | 8:38810209  | 0           | 35    | UncertainSignificance | VOUS |
| A130 | M | PAK3    | // | HEM      | c.525_526insGAAGAG | p.Glu176_Glu177insGluGlu | X:110406199 | 0           | 21    | UncertainSignificance | LP   |
| A130 | M | RANBP17 | 2  | COMP HET | c.692T>C           | p.Ile231Thr              | 5:170338070 | 0,00339457  | 24.5  | LikelyBenign          | VOUS |
| A130 | M | RANBP17 | 2  | COMP HET | c.3244T>C          | p.Cys1082Arg             | 5:170725839 | 3,18431E-05 | 11.58 | UncertainSignificance | VOUS |
| A130 | M | RBL1    | // | HETdn    | c.2011A>G          | p.Met671Val              | 20:35663804 | 0           | 13.17 | UncertainSignificance | VOUS |
| A131 | M | DDX53   | 2  | HEM      | c.543A>C           | p.Glu181Asp              | X:23018717  | 1,09765E-05 | 23.2  | LikelyBenign          | VOUS |
| A131 | M | AR      | 2  | HEM      | c.170_171insGCA    | p.Leu57_Gln58insGln      | X:66765158  | 0           | 13.6  | LikelyBenign          | VOUS |
| A132 | M | KCND1   | // | HEM      | c.1368+1G>A        |                          | X:48823167  | 0           | 27.9  | UncertainSignificance | LP   |
