# Supplementary material for: Unveiling genetic insights: Array-CGH and WES discoveries in a cohort of 122 children with essential autism spectrum disorder
Source: PubMed Central journal article supplement (PMC11629504; doi:10.1186/s12864-024-11077-5), 2024-12-10
Supplement: 12864_2024_11077_MOESM2_ESM.pdf [file 12864_2024_11077_MOESM2_ESM.pdf]

**Supplementary Table 2.** Copy number variants identified by array comparative genomic hybridization.

| CASE | SEX | CNV - ISCN 2020                        | SIZE      | CNV CLASSIFICATION | GENES           | Genes of Interest | SFARI score | TYPE OF GENE REARRANGEMENT |
|------|-----|----------------------------------------|-----------|--------------------|-----------------|-------------------|-------------|----------------------------|
| A003 | M   | 13q14.13q14.2(47240527_48096722)x1 pat | 856.2 kb  | VOUS               | <i>LRCH1</i>    |                   | //          | INT START                  |
| A003 |     |                                        |           |                    | <i>ESD</i>      |                   | //          | DELETED                    |
| A003 |     |                                        |           |                    | <i>HTR2A</i>    | <i>HTR2A</i>      | //          | DELETED                    |
| A006 | M   | 13q12.11(20146801_20270834)x3 pat      | 124.03 kb | VOUS               | <i>MPHOSPH8</i> | <i>MPHOSPH8</i>   | //          | DUPLICATED                 |
| A006 |     |                                        |           |                    | <i>PSPC1</i>    |                   | //          | INT END                    |
| A006 |     | 13q12.11(20411945_20559030)x3 pat      | 147.09 kb | VOUS               | <i>ZMYM5</i>    | <i>ZMYM5</i>      | //          | INT START                  |
| A006 |     |                                        |           |                    | <i>ZMYM2</i>    | <i>ZMYM2</i>      | S           | INT END                    |
| A006 |     | 17q21.31(41409849_41597925)x3 mat      | 188.08 kb | VOUS               | <i>DHX8</i>     | <i>DHX8</i>       | //          | INT END                    |
| A013 | M   | 7q11.22(69168540_69198438)x1 mat       | 29.9 kb   | LP                 | <i>AUTS2</i>    | <i>AUTS2</i>      | 1           | INTRAGENIC                 |
| A016 | M   | 16p13.11(14968878_16311041)X1 dn       | 1.34 Mb   | LP                 | <i>NOMO1</i>    |                   | //          | INT START                  |
| A016 |     |                                        |           |                    | <i>NPIPA1</i>   |                   | //          | DELETED                    |
| A016 |     |                                        |           |                    | <i>PDXDC1</i>   |                   | //          | DELETED                    |
| A016 |     |                                        |           |                    | <i>NTAN1</i>    |                   | //          | DELETED                    |
| A016 |     |                                        |           |                    | <i>RRN3</i>     |                   | //          | DELETED                    |
| A016 |     |                                        |           |                    | <i>MPV17L</i>   |                   | //          | DELETED                    |
| A016 |     |                                        |           |                    | <i>MARF1</i>    |                   | //          | DELETED                    |
| A016 |     |                                        |           |                    | <i>NDE1</i>     | <i>NDE1</i>       | //          | DELETED                    |
| A016 |     |                                        |           |                    | <i>MYH11</i>    |                   | //          | DELETED                    |
| A016 |     |                                        |           |                    | <i>FOPNL</i>    |                   | //          | DELETED                    |
| A016 |     |                                        |           |                    | <i>ABCC1</i>    |                   | //          | DELETED                    |
| A016 |     |                                        |           |                    | <i>ABCC6</i>    |                   | //          | INT END                    |
| A017 | M   | 16q21(60064996_63555913)x1 mat         | 3.49 Mb   | LP                 | <i>CDH8</i>     | <i>CDH8</i>       | 2           | DELETED                    |
| A020 | M   | 3q24(147111840_147118109)x3 dn         | 8.91 kb   | VOUS               | <i>ZIC1</i>     | <i>ZIC1</i>       | //          | INTRAGENIC                 |
| A020 |     |                                        |           |                    | <i>ZIC4</i>     |                   | //          | INTRAGENIC                 |
| A021 | F   | 15q13.1(29656854_29783953)x1 pat       | 127.1 kb  | VOUS               | <i>FAM189A1</i> | <i>FAM189A1</i>   | //          | INTRAGENIC                 |
| A022 | M   | Xp22.33(426261_679415)x2 mat           | 253.16 kb | LP                 | <i>SHOX</i>     | <i>SHOX</i>       | 2           | DUPLICATED                 |
| A025 | M   | 16q23.3(82184809_83663330)x3 mat       | 1.48 Mb   | VOUS               | <i>CDH13</i>    | <i>CDH13</i>      | 2           | INT END                    |
| A025 |     |                                        |           |                    | <i>MPHOSPH6</i> |                   | //          | INT START                  |
| A029 | F   | 7q21.11(81472446_81639364)x3 pat       | 166.92 kb | VOUS               | <i>CACNA2D1</i> | <i>CACNA2D1</i>   | 2           | INT END                    |
| A043 | M   | 16q23.2(80751184_80928051)x1 mat       | 176.87 kb | VOUS               | <i>CDYL2</i>    | <i>CDYL2</i>      | //          | INT START                  |
| A045 | M   | Xq21.1(77081624_77139044)x2 mat        | 57.42 kb  | VOUS               | <i>MAGT1</i>    | <i>MAGT1</i>      | //          | INT END                    |
| A050 | F   | 1q21.1q21.2(146542653_147872312)x1 pat | 1.33 Mb   | LP                 | <i>PRKAB2</i>   |                   | //          | DELETED                    |
| A050 |     |                                        |           |                    | <i>FMOS</i>     |                   | //          | DELETED                    |
| A050 |     |                                        |           |                    | <i>BCL9</i>     |                   | //          | DELETED                    |
| A050 |     |                                        |           |                    | <i>CHD1L</i>    |                   | //          | DELETED                    |
| A050 |     |                                        |           |                    | <i>ACP6</i>     |                   | //          | DELETED                    |
| A050 |     |                                        |           |                    | <i>GJA5</i>     |                   | //          | DELETED                    |
| A050 |     |                                        |           |                    | <i>GJA8</i>     |                   | //          | DELETED                    |
| A050 |     |                                        |           |                    | <i>GPR89B</i>   |                   | //          | DELETED                    |
| A054 | M   | 1q21.1q21.2(146499008_147860611)x3 pat | 1.36 Mb   | LP                 | <i>PRKAB2</i>   |                   | //          | DUPLICATED                 |
| A054 |     |                                        |           |                    | <i>FMOS</i>     |                   | //          | DUPLICATED                 |
| A054 |     |                                        |           |                    | <i>BCL9</i>     |                   | //          | DUPLICATED                 |
| A054 |     |                                        |           |                    | <i>CHD1L</i>    |                   | //          | DUPLICATED                 |
| A054 |     |                                        |           |                    | <i>ACP6</i>     |                   | //          | DUPLICATED                 |
| A054 |     |                                        |           |                    | <i>GJA5</i>     |                   | //          | DUPLICATED                 |
| A054 |     |                                        |           |                    | <i>GJA8</i>     |                   | //          | DUPLICATED                 |

|      |   |                                                         |           |                |                |    |            |
|------|---|---------------------------------------------------------|-----------|----------------|----------------|----|------------|
| A054 |   |                                                         |           | <i>GPR89B</i>  |                | // | DUPLICATED |
| A060 | M | 6q22.31(124068036_124449980)x3 mat                      | 382 Kb    | <i>NKAIN2</i>  | <i>NKAIN2</i>  | // | INT END    |
| A060 |   | 11q25(133124721_134353783)x3 mat                        | 1.23 Mb   | <i>OPCML</i>   |                | // | INT START  |
| A060 |   |                                                         |           | <i>SPATA19</i> |                | // | DUPLICATED |
| A060 |   |                                                         |           | <i>IGSF9B</i>  |                | // | DUPLICATED |
| A060 |   |                                                         |           | <i>JAM3</i>    |                | // | DUPLICATED |
| A060 |   |                                                         |           | <i>NCAPD3</i>  |                | // | DUPLICATED |
| A060 |   |                                                         |           | <i>VPS26B</i>  |                | // | DUPLICATED |
| A060 |   |                                                         |           | <i>THYN1</i>   |                | // | DUPLICATED |
| A060 |   |                                                         |           | <i>ACAD8</i>   |                | // | DUPLICATED |
| A060 |   |                                                         |           | <i>B3GAT1</i>  |                | // | DUPLICATED |
| A060 |   | Yp11.32(1421350_1634267)x2 pat                          | 212.9 kb  | <i>IL3RA</i>   |                | // | INT START  |
| A060 |   |                                                         |           | <i>SLC25A6</i> |                | // | DUPLICATED |
| A060 |   |                                                         |           | <i>ASMTL</i>   |                | // | DUPLICATED |
| A060 |   |                                                         |           | <i>P2RY8</i>   |                | // | DUPLICATED |
| A065 | M | 9q33.1(119387004_119527204)x1 mat                       | 140.2 kb  | <i>TRIM32</i>  | <i>TRIM32</i>  | 3  | DELETED    |
| A065 |   |                                                         |           | <i>ASTN2</i>   | <i>ASTN2</i>   | 2  | INTRAGENIC |
| A065 |   | 10q23.1(84137861_84181161)x1 pat                        | 43.3Kb    | <i>NRG3</i>    | <i>NRG3</i>    | // | INTRAGENIC |
| A066 | F | 16q24.3(89428111_89453232)x3 pat                        | 25.12 kb  | <i>ANKRD11</i> | <i>ANKRD11</i> | 1  | INTRAGENIC |
| A078 | M | 5q11.2(51915987_53470988)x1 mat                         | 1.56 Mb   | <i>PELO</i>    |                | // | DELETED    |
| A078 |   |                                                         |           | <i>ITGA1</i>   |                | // | DELETED    |
| A078 |   |                                                         |           | <i>ITGA2</i>   |                | // | DELETED    |
| A078 |   |                                                         |           | <i>MOCS2</i>   |                | // | DELETED    |
| A078 |   |                                                         |           | <i>FST</i>     |                | // | DELETED    |
| A078 |   |                                                         |           | <i>NDUFS4</i>  |                | // | DELETED    |
| A078 |   |                                                         |           | <i>ARL15</i>   |                | // | DELETED    |
| A078 |   | 6q27(165421392_165801341)x3 pat                         | 335.6 kb  | <i>PDE10A</i>  | <i>PDE10A</i>  | // | INT END    |
| A079 | M | 1p32.1(59947236_60012581)x1 mat                         | 65.35 kb  | <i>FGGY</i>    | <i>FGGY</i>    | // | INTRAGENIC |
| A080 | M | 6p21.32(32179815_32312148)x1 mat                        | 132.33 Kb | <i>NOTCH4</i>  | <i>NOTCH4</i>  | // | DELETED    |
| A080 |   | 11q14.1(84455989_84607402)x1 mat                        | 151.4 Kb  | <i>DLG2</i>    | <i>DLG2</i>    | 2  | INTRAGENIC |
| A082 | M | 15q11.2(25226260_25241828)x3 mat                        | 15.57 kb  | <i>SNURF</i>   | <i>SNURF</i>   | // | INTRAGENIC |
| A082 |   |                                                         |           | <i>SNHG14</i>  |                | // | INTRAGENIC |
| A082 |   | 16p13.3(7041435_7132676)x1 pat                          | 91.24 kb  | <i>RBFOX1</i>  | <i>RBFOX1</i>  | 2  | INTRAGENIC |
| A088 | M | Xp22.33(1189595_1383266)x2 o Yp11.32(1162459_1322464)x2 | 192.42    | <i>CRLF2</i>   | <i>CRLF2</i>   | // | DUPLICATED |
| A093 | M | 7q36.3(158801633_158903310)x3 mat                       | 101.68 kb | <i>VIPR2</i>   | <i>VIPR2</i>   | // | INT END    |
| A095 | M | Xp22.31(7532513_8115193)x2 mat                          | 582.68 Kb | <i>VCX</i>     |                | // | DUPLICATED |
| A095 |   |                                                         |           | <i>PNPLA4</i>  |                | // | DUPLICATED |
| A097 | M | Xp22.33(169791_537202)x2 mat                            | 367.41 kb | <i>PLCXD1</i>  |                | // | DUPLICATED |
| A097 |   |                                                         |           | <i>GTPBP6</i>  |                | // | DUPLICATED |
| A097 |   |                                                         |           | <i>PPP2R3B</i> |                | // | DUPLICATED |
| A099 | M | 3q29(196418238_196487740)x3 pat                         | 69.5kb    | <i>PIGX</i>    |                | // | INT START  |
| A099 |   |                                                         |           | <i>PAK2</i>    | <i>PAK2</i>    | 2  | INT END    |
| A107 | M | 13q14.11(43558077_43731680)x3 mat                       | 173.6 kb  | <i>EPSTI1</i>  |                | // | INT START  |
| A107 |   |                                                         |           | <i>DNAJC15</i> |                | // | DUPLICATED |
| A110 | M | 2q23.1(148805626_148936476)x1 mat                       | 130.85 kb | <i>MBD5</i>    | <i>MBD5</i>    | 1  | INTRAGENIC |
| A113 | M | 13q12.11(20413829_20445336)x3 mat                       | 31.51 Kb  | <i>ZMYM5</i>   | <i>ZMYM5</i>   | // | INT START  |
| A119 | M | Yp11.32(771993_1322464)x2 pat                           | 550 Kb    | <i>CRLF2</i>   | <i>CRLF2</i>   | // | DUPLICATED |
| A120 | M | 8q24.3(144825929_144881529)x3 pat                       | 55.6 Kb   | <i>SCRIB</i>   | <i>SCRIB</i>   | // | INT END    |
| A120 |   | 14q31.1(79388339_79657573)x1 dn                         | 269.24 Kb | <i>NRXN3</i>   | <i>NRXN3</i>   | 1  | INTRAGENIC |

|      |   |                                           |           |      |                 |                |    |            |
|------|---|-------------------------------------------|-----------|------|-----------------|----------------|----|------------|
| A121 | F | 13q32.2(99177988_99271292)x3 pat          | 93.31 Kb  | VOUS | <i>STK24</i>    | <i>STK24</i>   | // | INT START  |
| A121 | M | 4q25(110390080_110653618)x3 mat           | 263.54 Kb | VOUS | <i>SEC24B</i>   | <i>SEC24B</i>  | // | INT START  |
| A121 |   |                                           |           |      | <i>CASP6</i>    |                | // | DUPLICATED |
| A121 |   |                                           |           |      | <i>PLA2G12A</i> |                | // | DUPLICATED |
| A121 |   | 4q25(113167151_113610549)x3 mat           | 443.4 Kb  | VOUS | <i>AP1AR</i>    |                | // | INT START  |
| A121 |   |                                           |           |      | <i>TIFA</i>     |                | // | DUPLICATED |
| A121 |   |                                           |           |      | <i>ALPK1</i>    |                | // | DUPLICATED |
| A121 |   |                                           |           |      | <i>NEUROG2</i>  | <i>NEUROG2</i> | // | DUPLICATED |
| A121 |   |                                           |           |      | <i>LARP7</i>    |                | // | DUPLICATED |
| A124 | M | 1q21.1q21.2(145804790_147860611)x3 pat    | 2.06 Mb   | LP   | <i>GPR89A</i>   |                | // | INT START  |
| A124 |   |                                           |           |      | <i>NBPF11</i>   |                | // | DUPLICATED |
| A124 |   |                                           |           |      | <i>HYDIN2</i>   | <i>HYDIN2</i>  | 2  | DUPLICATED |
| A124 |   |                                           |           |      | <i>NBPF12</i>   |                | // | DUPLICATED |
| A124 |   |                                           |           |      | <i>PRKAB2</i>   |                | // | DUPLICATED |
| A124 |   |                                           |           |      | <i>FMOS</i>     |                | // | DUPLICATED |
| A124 |   |                                           |           |      | <i>BCL9</i>     |                | // | DUPLICATED |
| A124 |   |                                           |           |      | <i>CHD1L</i>    |                | // | DUPLICATED |
| A124 |   |                                           |           |      | <i>ACP6</i>     |                | // | DUPLICATED |
| A124 |   |                                           |           |      | <i>GJA5</i>     |                | // | DUPLICATED |
| A124 |   |                                           |           |      | <i>GJA8</i>     |                | // | DUPLICATED |
| A124 |   |                                           |           |      | <i>GPR89B</i>   |                | // | DUPLICATED |
| A124 |   | 12q24.12q24.13(112184121_112302954)x3 pat | 118.83 Kb | VOUS | <i>ACAD10</i>   |                | // | INT START  |
| A124 |   |                                           |           |      | <i>ALDH2</i>    |                | // | DUPLICATED |
| A124 |   |                                           |           |      | <i>MAPKAPK5</i> |                | // | INT END    |
| A125 | M | Xq12(65768203_65926180)x2 mat             | 155.7 Kb  | VOUS | <i>EDA2R</i>    | <i>EDA2R</i>   | // | DUPLICATED |
